# Supplementary material for: Differential Proteomic Analysis of Anthers between Cytoplasmic Male Sterile and Maintainer Lines in Capsicum annuum L
Source: MDPI journal article supplement (doi:10.3390/ijms141122982), 2013-11-20
Supplement: s1 [file s1]

## Sheet: Supplementary Table S1
Table S1. Peptide sequences of the 27 protein spots identified by MS-MS analysis.
Spot No. a	Accession No. b	Peptide sequence c	Mr(expt.) d	Mr (calc.) e	Miss. f	Ions Score
A01	gi|1172583	K.YQLATSR.M	837.443	837.434	0	-
		R.IPPMFDR.E	874.426	874.437	0	39
		R.EGSSLYDEKR.N	1182.54	1182.55	1	53
		R.DLSNKDWLNSEFFFYDENR.N	2438.04	2438.08	1	-
		K.DWLNSEFFFYDENR.N	1880.78	1880.8	0	58
		R.NFKPIR.R	773.455	773.455	0	-
A02	gi|1172583	K.YQLATSR.M	837.411	837.434	0	-
		R.ELDKDPFDPLGFK.Q	1519.77	1519.76	1	-
		R.IPPMFDR.E	874.424	874.437	0	39
		R.IPPMFDR.E+ Oxidation (M)	890.437	890.432	0	-
		R.EGSSLYDEKR.N	1182.57	1182.55	1	34
		R.DLSNKDWLNSEFFFYDENR.N	2438.14	2438.08	1	-
		K.DWLNSEFFFYDENR.N	1880.82	1880.8	0	67
		R.NFKPIR.R	773.421	773.455	0	-
A03	gi|114421	R.FDEGLPPILTALEVLDNQIR.L	2252.23	2252.21	0	-
		R.LVLEVAQHLGENMVR.T	1706.92	1706.91	0	-
		R.TIAMDGTEGLVR.G	1261.64	1261.63	0	-
		R.VLNTGSPITVPVGR.A	1408.82	1408.8	0	-
		K.VVDLLAPYQR.G	1172.66	1172.66	0	39
		K.AHGGFSVFAGVGER.T	1389.68	1389.68	0	-
		R.EGNDLYR.E	865.391	865.393	0	-
		K.CALVYGQMNEPPGAR.A	1661.77	1661.77	0	-
		R.VGLTGLTVAEHFR.D	1398.77	1398.76	0	-
		R.DAEGQDVLLFIDNIFR.F	1863.94	1863.94	0	80
		R.FTQANSEVSALLGR.I	1491.78	1491.77	0	75
		R.IPSAVGYQPTLATDLGGLQER.I	2185.15	2185.14	0	-
		R.QISELGIYPAVDPLDSTSR.M	2060.06	2060.04	0	-
A04	gi|114421	R.FDEGLPPILTALEVLDNQIR.L	2252.17	2252.21	0	-
		R.LVLEVAQHLGENMVR.T	1706.9	1706.91	0	-
		R.TIAMDGTEGLVR.G	1261.65	1261.63	0	-
		R.VLNTGSPITVPVGR.A	1408.8	1408.8	0	-
		K.VVDLLAPYQR.G	1172.65	1172.66	0	46
		K.AHGGFSVFAGVGER.T	1389.67	1389.68	0	78
		R.EGNDLYREMIESGVIK.L+ Oxidation (M)	1867.86	1867.9	1	-
		K.CALVYGQMNEPPGAR.A	1661.74	1661.77	0	-
		R.VGLTGLTVAEHFR.D	1398.75	1398.76	0	-
		R.DAEGQDVLLFIDNIFR.F	1863.92	1863.94	0	81
		R.FTQANSEVSALLGR.I	1491.76	1491.77	0	-
		R.IPSAVGYQPTLATDLGGLQER.I	2185.1	2185.14	0	-
		R.QISELGIYPAVDPLDSTSR.M	2060	2060.04	0	-
A07	gi|378724806	-.IQPLVCDNGTGMVK.A+ Oxidation (M)	1546.73	1546.75	0	-
		K.AGFAGDDAPR.A	975.459	975.441	0	-
		R.HTGVMVGMGQK.D+2 Oxidation (M)	1175.53	1175.54	0	-
		K.YPIEHGIVSNWDDMEK.I	1931.88	1931.87	0	-
		K.IWHHTFYNELR.V	1514.74	1514.74	0	-
		R.VAPEEHPVLLTEAPLNPK.A	1953.07	1953.06	0	-
		K.LAYVALDYEQELETAR.S	1882.94	1882.93	0	88
		K.SYELPDGQVITIGAER.F	1746.88	1746.88	0	67
B01	gi|225442531	K.IVNDGVTVAR.E	1042.56	1042.58	0	-
		K.VVAAGANPVQITR.G	1294.72	1294.74	0	-
		K.AAVEEGIVVGGGCTLLR.L	1699.87	1294.74	0	91
		R.CCLEHAASVAR.T	1272.56	1272.57	0	-
B02	gi|145334669	K.QMLIHQGK.V	953.49	953.512	0	-
		R.LIQEHQADFLR.L	1368.77	1368.71	0	62
B03	gi|89280620	R.ELIIGDR.Q	815.4320	814.4247	0	-
		R.IEQYNR.E	822.3774	821.3702	0	-
		R.QMSLLLR.R	860.4803	859.4731	0	-
		K.ATQNQLAR.G	901.4741	900.4668	0	-
		R.KFLVELR.T	904.5436	903.5363	1	-
		R.GEISASEFR.L	995.4737	994.4664	0	-
		R.ADEISNIIR.E	1030.55	1029.54	0	-
		R.ERIEQYNR.E	1107.55	1106.54	1	-
		K.EAIQEQMDR.F	1119.51	1118.51	0	-
		R.LIESAAPGIISR.R	1226.72	1225.71	0	-
		R.VVNALAKPIDGR.G	1252.73	1251.73	0	-
		R.HTLIIYDDLSK.Q	1317.71	1316.71	0	-
		R.IAQIPVSEAYLGR.V	1416.79	1415.78	0	78
		K.ASSVAQVVTTLQER.G	1488.81	1487.8	0	39
		R.EAYPGDVFYLHSR.L	1553.74	1552.74	0	78
		K.IVNTGTVLQVGDGIAR.I	1612.9087	1611.9014	0	66
B04	gi|78102516	R.ADEISNIIR.E	1029.52	1029.55	0	-
		R.ERIEQYNR.E	1106.52	1106.55	1	-
		R.IEQYNR.E	821.372	821.403	0	-
		K.IVNTGTVLQVGDGIAR.I	1611.87	1611.89	0	97
		R.IAQIPVSEAYLGR.V	1415.76	1415.78	0	81
		R.GEISASEFR.L	994.451	994.472	0	-
		R.LIESAAPGIISR.R	1225.68	1225.7	0	-
		K.ASSVAQVVTTLQER.G	1487.77	1487.79	0	74
		K.QAQAYR.Q	735.356	735.366	0	-
		R.EAYPGDVFYLHSR.L	1552.71	1552.73	0	89
		K.ATQNQLAR.G	900.458	900.478	0	-
		R.KFLVELR.T	903.54	903.554	1	-
		K.FLVELR.T	775.449	775.459	0	-
		K.TNKPQFQEIISSTK.T	1619.82	1619.85	0	-
		K.EAIQEQMDR.F	1118.49	1118.5	0	-
B05	gi|315440801	K.YQYAHTWFR.N	1270.58	1270.59	0	-
		R.SSLEQSFSYYSADDGSK.D	1869.79	1869.79	0	-
		K.VPATILR.G	768.482	768.486	0	-
		R.IRDYR.A	721.381	721.387	1	-
		K.DDSNEFSVLVDR.S	1394.64	1394.63	0	88
		R.SVGGSSLVDGQLELMLHR.R	1896.93	1896.97	0	-
		R.SVGGSSLVDGQLELMLHR.R+ Oxidation (M)	1912.96	1912.97	0	48
		R.RLLHDDGR.G	980.507	980.515	1	-
		R.LLHDDGR.G	824.417	824.414	0	-
		R.LAHLYEVDEDKDLSTK.A	1874.94	1874.93	1	-
		K.EMSLSANQEREEMEK.K	1809.79	1809.79	1	-
		K.WKAEAPSDSQDVPR.G	1584.75	1584.75	1	-
		K.LVVELAPMEIR.T	1268.72	1268.72	0	-
		K.LVVELAPMEIR.T+Oxidation (M)	1284.71	1284.71	0	33
B06	gi|378724806	-.IQPLVCDNGTGMVK.A+ Oxidation (M)	1546.71	1546.75	0	-
		K.AGFAGDDAPR.A	975.418	975.441	0	-
		R.HTGVMVGMGQK.D+2 Oxidation (M)	1175.51	1175.54	0	-
		K.YPIEHGIVSNWDDMEK.I	1931.84	1931.87	0	-
		K.IWHHTFYNELR.V	1514.72	1514.74	0	-
		R.VAPEEHPVLLTEAPLNPK.A	1953.03	1953.06	0	-
		K.LAYVALDYEQELETAR.S	1882.91	1882.93	0	-
		K.SYELPDGQVITIGAER.F	1746.85	1746.88	0	-
B07	gi|26454627	K.ANEYAEMNPNFLGCAENALGIR.E	2453.09	2453.11	0	-
		K.ANEYAEMNPNFLGCAENALGIR.E+ Oxidation (M)	2469.07	2469.11	0	-
		K.AAAAAGLTVAEVTGSNTVSVAEDELMR.I	2632.29	2632.3	0	-
		K.TVGTVGAGR.I	816.426	816.445	0	-
		R.LKPFNCNLLYHDR.L	1688.81	1688.85	0	40
		K.GVLIVNNAR.G	954.539	954.561	0	-
		K.DHPWR.Y	709.31	709.33	0	-
		R.YMPNQAMTPHISGTTIDAQLR.Y	2344.1	2344.13	0	-
		K.GEDFPAENYIVK.D	1380.63	1380.66	0	-
		K.DGELAPQYR.-	1047.48	1047.5	0	38
B09	gi|541632	K.HKEHIAAYGEGNER.R	1609.73	1609.76	1	95
		K.EHIAAYGEGNER.R	1344.57	1344.61	0	94
		K.WGVANR.G	701.337	701.361	0	-
		K.GYFEDR.R	785.309	785.334	0	27
B10	gi|12802875	K.WNYDGSSTGQAPGEDSEVILYPQAIFR.D	2999.35	2999.39	0	-
		K.NVKWPMGWPTGGYPGPQGPYYCGVGADK.A + Oxidation (M)	3054.43	3054.38	1	-
		R.HKEHIAAYGEGNER.R	1609.75	1609.76	1	101
		K.EHIAAYGEGNER.R	1344.6	1344.61	0	94
		K.WGVANR.G	701.357	701.361	0	-
		K.GYFEDR.R	785.334	785.334	0	30
B11	gi|82400168	K.ALPYMDFVFGNETEAR.I	1858.93	1858.86	0	53
		K.VHGWETDNVEEIALK.I	1738.92	1738.85	0	-
		K.ISQWPK.A	757.433	757.412	0	-
B12	gi|541632	K.HKEHIAAYGEGNER.R	1609.74	1609.76	1	68
		K.EHIAAYGEGNER.R	1344.6	1344.61	0	-
		K.EHIAAYGEGNERR.L	1500.67	1500.71	1	-
		K.WGVANR.G	701.36	701.361	0	-
		K.GYFEDR.R	785.329	785.334	0	-
B13	gi|239911810	K.RLTFDEIQSK.T	1235.64	1235.65	1	41
		K.FEEKDGIDYAAVTVQLPGGER.V	2293.1	2293.12	1	-
		K.DGIDYAAVTVQLPGGER.V	1759.85	1759.87	0	96
		R.GGSTGYDNAVALPAGGR.G	1561.74	1561.75	0	95
B14	gi|225710	R.LQAFEPIR.S	972.52	972.539	0	-
		R.SQAGTTEFFDVSNELFQCTGVSVVR.R	2777.26	2777.3	0	-
		R.RVIEPR.G	768.448	768.461	1	-
		R.NPQAYR.R	747.348	747.366	0	-
		R.QLQCQNDQR.G	1188.52	1188.53	0	38
B15	gi|20217	R.LQAFEPIR.S	972.512	972.539	0	-
		R.SQAGTTEFFDVSNEQFQCTGVSVVR.R	2792.35	2792.27	0	-
		R.DFLLAGNKR.N	1032.55	1032.57	1	33
		R.NPQAYRR.E	903.423	903.467	1	-
		R.QLQCQNDQR.G	1188.52	1188.53	0	51
		R.VEHGLSLLQPYASLQEQEQGQVQSR.E	2823.52	2823.42	0	-
B16	gi|3979715	R.QTYAETFGEDLLK.E	1513.73	1513.73	0
		R.QTYAETFGEDLLKELDR.E	2026.99	2026.98	1
		K.ELDRELTHDFEK.L	1530.74	1530.73	1
		K.LVLVWTLDPSER.D	1426.78	1426.78	0	30
		K.SNFVLVELACTR.S	1407.71	1407.72	0	90
		K.ELVLAR.E	699.417	699.428	0	-
		R.EAYHAR.Y	745.349	745.351	0	-
		K.SLEEDVAYHTTGDHR.K	1728.77	1728.77	0	-
		K.SLEEDVAYHTTGDHRK.L	1856.87	1856.87	1	-
		K.LLVPLVSSYR.Y	1145.67	1145.68	0	-
		R.YGGEEVDLR.L	1036.48	1036.48	0	-
		K.AYSDDEVIR.I	1066.49	1066.49	0	-
		R.SKAQLNATLNHYK.D	1486.72	1486.79	1	-
		K.AQLNATLNHYKDEHGEDILK.Q	2308.14	2308.14	1	-
		K.QLEDGDEFVALLR.A	1503.76	1503.76	0	60
		R.ATIKGLVYPEHYFVEVLR.D	2133.08	2133.16	1	-
		K.GLVYPEHYFVEVLR.D	1719.9	1719.9	0	58
		R.RGTEEDHLTR.V	1212.59	1212.58	1	-
		R.GTEEDHLTR.V	1056.48	1056.48	0	-
		R.DSIPLGR.A	756.411	756.413	0	-
B17	gi|193290676	K.HQEVGHK.S	833.407	833.414	0	-
		R.ENYELGLPIIQK.A	1415.75	1415.77	0	-
		R.EGPALPVLDR.L	1065.58	1065.58	0	55
		K.NNHGTYDFIFVDADKDNYINYHK.R	2802.2	2802.27	1	-
		K.RIIELVK.V	869.536	869.57	1	-
		R.DFVLELNK.A	976.502	976.523	0	-
		K.ALAADPR.I	712.378	712.387	0	-
		R.IEICMLPVGDGITLCR.R	1845.89	1845.92	0	64
		R.IEICMLPVGDGITLCR.R +Oxidation (M)	1861.89	1861.91	0	-
B19	gi|38112662	R.RAILGESNEFVGDK.V	1533.75	1533.78	1	-
		R.AILGESNEFVGDK.V	1377.65	1377.68	0	-
		R.VIACVGETLEQR.E	1373.67	1373.7	0	75
		K.VATPAQAQEVHAELR.K	1618.82	1618.84	0	85
		K.VATPAQAQEVHAELRK.W	1746.92	1746.94	1	47
		R.IIYGGSVSGANCK.E	1324.6	1324.64	0	-
B20	gi|254798560	K.VYGPTLSTAVSR.V	1249.65	1249.67	0	67
		K.VLDVYEKR.L	1020.54	1020.56	1	-
B21	gi|38112662	R.VIACVGETLEQR.E	1373.69	1373.7	0	78
		K.VATPAQAQEVHAELR.K	1618.84	1618.84	0	54
		K.VATPAQAQEVHAELRK.W	1746.93	1746.94	1	44
		K.WLQANVSAEVAASTR.I	1601.81	1601.82	0	110
		K.ELAGQPDVDGFLVGGASLKPEFIDIIK.A	2827.46	2827.5	0	-
B22	gi|40644130	K.VQELSVYELNER.D	1477.75	1477.74	0	71
		R.GSPAYLR.L	762.411	762.402	0	-
B23	gi|241865142	K.EVEYPGQVLR.Y	1188.6	1188.61	0	53
		K.EYYFLSVLTR.T	1289.65	1289.67	0	62
B24	gi|48209968	R.TIDWEGMAK.L	1049.48	1049.49	0	-
		K.LLVTDEAR.K	915.482	915.503	0	-
		R.KEFSNLR.R	892.454	892.477	1	-
		K.EFSNLR.R	764.366	764.382	0	-
		K.EFSNLRR.A	920.474	920.483	1	-
		R.RAFDDVNSQLQTK.F	1520.74	1520.76	1	-
		R.AFDDVNSQLQTK.F	1364.64	1364.66	0	-
		K.FSQEPEPINWEYYR.K	1856.81	1856.84	0	74
		K.FEDTVTPQYKPK.F	1451.7	1451.73	0	-
		K.FDALLVELK.E	1046.57	1046.6	0	-
		K.EVAEVQELK.K	1043.55	1043.55	0	-
		K.KFDDEIR.N	921.452	921.456	1	-
		K.FDDEIRNDYWGY.-	1591.63	1591.66	1	50
a. Spot number in 2-DE gel, as shown in Figure 1. Where A denotes sterile cytoplasm and B denotes normal cytoplasm.
b. Accession number in NCBInr/EST database.
c. The variable modifications of oxidised methionines were shown as +Oxidation (M).
d. Theoretical relative molecular mass of the matched peptide.
e. Calculated relative molecular mass of the matched peptide.
f. The number of missed enzyme cleavage sites.
